# Supplementary material
Source: PubMed Central journal article supplement (PMC10294671)
Supplement: jb.00113-23-s0001.pdf [file jb.00113-23-s0001.pdf]

Table S1. ECL Tle family phospholipases

| Effector class                                                  | Bacterial strain                                                         | NCBI Refseq                                         | length         | predicted ankyrin-repeat immunity protein(s)   |                                                |
|-----------------------------------------------------------------|--------------------------------------------------------------------------|-----------------------------------------------------|----------------|------------------------------------------------|------------------------------------------------|
| Tle                                                             | <i>Enterobacter cloacae</i> subsp. <i>cloacae</i> ATCC 13047             | WP_013096193.1                                      | 472            | WP_013096194.1                                 |                                                |
|                                                                 | <i>Enterobacter hormaechei</i> ATCC 49162                                | WP_006810941.1                                      | 488            | WP_006810940.1                                 |                                                |
|                                                                 | <i>Pseudocherichia vulneris</i> NCTC12130                                | WP_042387755.1                                      | 496            | WP_042387753.1; WP_115084734.1                 |                                                |
|                                                                 | <i>Cronobacter sakazakii</i> ATCC BAA-894                                | WP_007853550.1                                      | 476            | WP_007889010.1                                 |                                                |
|                                                                 | <i>Cronobacter condimenti</i> 1330                                       | WP_007668262.1                                      | 488            | WP_007668245.1                                 |                                                |
|                                                                 | <i>Kosakonia sacchari</i> SP1                                            | WP_017456470.1                                      | 472            | WP_017456469.1                                 |                                                |
|                                                                 | <i>Phytobacter massiliensis</i> JC163                                    | WP_044180714.1                                      | 468            | WP_237567481.1                                 |                                                |
|                                                                 | <i>Lelliottia nimpessuralis</i> 51                                       | TFB20627.1                                          | 472            | TFB20626.1                                     |                                                |
|                                                                 | <i>Citrobacter</i> sp. R56                                               | WP_203360225.1                                      | 488            | WP_203361220.1                                 |                                                |
|                                                                 | <i>Salmonella enterica</i> subsp. <i>enterica</i> serovar <i>Newport</i> | EBR8158188.1                                        | 488            | EBR8158189.1                                   |                                                |
|                                                                 | <i>Franconibacter</i> sp. IITDAS19                                       | WP_024557997.1                                      | 479            | WP_247365411.1                                 |                                                |
|                                                                 | <i>Phytobacter</i> sp. SCO41                                             | WP_108700663.1                                      | 474            | WP_108700662.1                                 |                                                |
|                                                                 | <i>Serratia ureilytica</i> SER00108                                      | WP_197777867.1                                      | 493            | I5P71_RS11495 (pseudo); WP_197776957.1         |                                                |
|                                                                 | <i>Serratia marcescens</i> BWH-23                                        | AVU29873.1                                          | 493            | AVU29874.1; AVU29875.1                         |                                                |
|                                                                 | <i>Serratia marcescens</i> MGH135                                        | WP_033646675.1                                      | 493            | WP_025302229.1                                 |                                                |
|                                                                 | <i>Serratia marcescens</i> Db11                                          | WP_025302228.1                                      | 493            | WP_025302229.1; WP_025302230.1                 |                                                |
|                                                                 | PAAR                                                                     | <i>Lonsdalea quercina</i> NCCB 100489               | WP_027063756.1 | 464                                            | WP_026739306.1                                 |
|                                                                 |                                                                          | <i>Brenneria</i> sp. L3-3C-1                        | WP_199379546.1 | 456                                            | WP_199379544.1; WP_199379560.1; WP_233356511.1 |
| <i>Pectobacterium carotovorum</i> subsp. <i>carotovorum</i> PC1 |                                                                          | WP_015841393.1                                      | 456            | WP_043881824.1                                 |                                                |
| <i>Dickeya dadantii</i> 3937                                    |                                                                          | WP_013317122.1                                      | 456            | WP_013317123.1; WP_237703452.1                 |                                                |
| <i>Dickeya chrysanthemi</i> Ech1591                             |                                                                          | WP_012770502.1                                      | 456            | WP_012770501.1; WP_012770500.1; WP_012770499.1 |                                                |
| <i>Vibrio nigripulchritudo</i> ATCC 27043                       |                                                                          | WP_004404991.1                                      | 513            | WP_004404995.1                                 |                                                |
| <i>Vibrio parahaemolyticus</i> JW16-127                         |                                                                          | EHA1109881.1                                        | 513            | EHA1109882.1                                   |                                                |
| <i>Vibrio mimicus</i> VM223                                     |                                                                          | WP_001138502.1                                      | 505            | WP_000199146.1; WP_000934380.1                 |                                                |
| <i>Polyangium aurulentum</i> SDU3-1                             |                                                                          | WP_169508841.1                                      | 421            | WP_136926720.1                                 |                                                |
| DUF4150<br>(PAAR-like)                                          | <i>Pantoea</i> sp. PSNIH2                                                | AIX74951.1                                          | 422            | AIX74950.1                                     |                                                |
|                                                                 | <i>Franconibacter pulveris</i> LMG 24059                                 | WP_029591452.1                                      | 431            | WP_029591453.1                                 |                                                |
|                                                                 | <i>Halopseudomonas salegens</i> CECT 8338                                | WP_092383249.1                                      | 434            | WP_197675042.1                                 |                                                |
|                                                                 | <i>Tahibacter caeni</i> BUT-6                                            | WP_257385295.1                                      | 424            | WP_257385296.1                                 |                                                |
|                                                                 | <i>Xanthomonas translucens</i> pv. <i>cerealis</i>                       | WP_142742694.1                                      | 419            | WP_221887383.1                                 |                                                |
|                                                                 | <i>Xanthomonas youngii</i> AmX2                                          | WP_206232757.1                                      | 433            | WP_206232758.1                                 |                                                |
|                                                                 | <i>Sorangium</i> sp. Soce836                                             | AUX33661.1                                          | 396            | AUX33660.1                                     |                                                |
|                                                                 | <i>Sorangium cellulosum</i> So0157-2                                     | WP_020737320.1                                      | 409            | WP_020737319.1                                 |                                                |
|                                                                 | <i>Thauera butanivorans</i> NBRC 103042                                  | WP_068639422.1                                      | 433            | WP_157659236.1; WP_068639420                   |                                                |
|                                                                 | <i>Lampropedia aestuarii</i> YIM MLB12                                   | WP_136407722.1                                      | 437            | WP_136407723.1; WP_136407723.1                 |                                                |
|                                                                 | <i>Burkholderia vietnamiensis</i> AU35216                                | WP_249181664.1                                      | 382            | WP_150331737.1                                 |                                                |
|                                                                 | <i>Burkholderia thailandensis</i> Bt10013                                | WP_150331736.1                                      | 400            | WP_150331737.1; WP_150331738.1                 |                                                |
|                                                                 | <i>Burkholderia pseudomallei</i> MSHR7500                                | WP_038799229.1                                      | 396            | WP_038799227.1                                 |                                                |
|                                                                 | VgrG                                                                     | <i>Aggregatibacter actinomycetemcomitans</i> SL7469 | MBN6065491.1   | 1060                                           | MBN6065490.1                                   |
| <i>Pasteurella testudinis</i> NCTC12150                         |                                                                          | WP_115306396.1                                      | 1018           | WP_115306395.1                                 |                                                |
| <i>Burkholderia gladioli</i> BSR3                               |                                                                          | WP_013700226.1                                      | 996            | WP_013700225.1                                 |                                                |
| <i>Burkholderia multivorans</i> AU16734                         |                                                                          | WP_105792066.1                                      | 1001           | WP_059936093.1                                 |                                                |
| <i>Burkholderia cepacia</i> ATCC 25416                          |                                                                          | WP_027786768.1                                      | 999            | WP_226153282.1                                 |                                                |
| <i>Desulfuromonas versatilis</i> NIT-T3                         |                                                                          | WP_221250508.1                                      | 1082           | WP_221250509.1                                 |                                                |
| <i>Chondromyces crocatus</i> Cm c5                              |                                                                          | WP_063796395.1                                      | 1019           | WP_050434209.1                                 |                                                |
| <i>Geobacter benzoatilyticus</i> Jerry-YX                       |                                                                          | WP_207164315.1                                      | 942            | WP_207164316.1                                 |                                                |
| <i>Cystobacter fuscus</i> DSM 52655                             |                                                                          | WP_157758952.1                                      | 1050           | WP_157758953.1                                 |                                                |
| Rhs                                                             |                                                                          | <i>Pseudomonas fluorescens</i> UM270                | WP_042727971.1 | 4024                                           | WP_080921999.1                                 |
|                                                                 | <i>Pseudomonas palleroniana</i> PS006                                    | WP_060752379.1                                      | 3668           | WP_158510675.1                                 |                                                |
|                                                                 | <i>Vibrio vulnificus</i> NBRC 15645 = ATCC 27562                         | WP_017422738.1                                      | 1515           | WP_017422739.1                                 |                                                |
|                                                                 | <i>Vibrio cincinnatiensis</i> 19-VB00020                                 | WP_238132309.1                                      | 1558           | WP_238124837.1                                 |                                                |
| CdiA                                                            | <i>Desulfovibrio subterraneus</i> ND17                                   | WP_269890085.1                                      | 1965           | WP_269890084.1                                 |                                                |
|                                                                 | <i>Cupidesulfovibrio liaohensis</i> XJ01                                 | WP_167127856.1                                      | 1900           | WP_167127853.1 (partial)                       |                                                |
|                                                                 | <i>Desulfomicrobium</i> sp. ZS1                                          | WP_254080456.1                                      | 2300           | WP_254080455.1                                 |                                                |
|                                                                 | <i>Pseudodesulfovibrio piezophilus</i> C1TLV30                           | CCH47381.1                                          | 1774           | CCH47382.1                                     |                                                |
