# Supplementary material
Source: PubMed Central journal article supplement (PMC10294671)
Supplement: jb.00113-23-s0002.pdf [file jb.00113-23-s0002.pdf]

**Table S2. Oligonucleotides**

| <b>Identifier</b> | <b>Description</b>    | <b>Sequence (restriction sites underlined)</b>                  | <b>Reference</b> |
|-------------------|-----------------------|-----------------------------------------------------------------|------------------|
| CH2020            | ARB1                  | 5' - GGC CAC GCG TCG ACT AGT ACN NNN NNN NNN GAT AT             | This study       |
| CH2021            | ARB2                  | 5' - GGC CAC GCG TCG ACT AGT AC                                 | This study       |
| CH2022            | ARB6                  | 5' - GGC CAC GCG TCG ACT AGT ACN NNN NNN NNN ACG CC             | This study       |
| CH3023            | tssM-Nco-for          | 5' - TTT <u>CCA TGG</u> TGA CGA CTC TTC TTT C                   | This study       |
| CH3024            | tssM-Xho-rev          | 5' - TTT <u>CTC GAG</u> TTA TGG GCA TGA GAA ACG                 | This study       |
| CH3025            | gusA-Eco-for          | 5' - TTT <u>GAA TTC</u> TTA ATG AGG AGT CCC TTA TCT TAC         | This study       |
| CH3026            | gusA-Sac-rev          | 5' - TTT <u>GAG CTC</u> GAT TCA TTG TTT GCC TCC CTG             | This study       |
| CH3146            | ECL-Pcdi-Kpn          | 5' - TTT <u>GGT ACC</u> GTT ACG GCG GTC AAT CAG ATC             | This study       |
| CH3147            | ECL-PcdiB-Eco         | 5' - TTT <u>GAA TTC</u> ACT GCC ACT CCT TGC TAA AAG             | This study       |
| CH3197            | vgrG2(KO)-Xho         | 5' - TTT <u>CTC GAG</u> GCT GGA GCG GTG CTT G                   | 28               |
| CH3198            | vgrG2(KO)-Kpn         | 5' - TTT <u>GGT ACC</u> CGA GTC CAG ACA ATC AGG                 | 28               |
| CH3373            | tIe(KO)-Sac           | 5' - CAA <u>GAG CTC</u> CGG GAT GGT TGC C                       | This study       |
| CH3374            | tIe(KO)-Bam           | 5' - ATT <u>GGA TCC</u> GTC CTG TTA CCA GTC                     | This study       |
| CH3377            | tIi(KO)-Xho           | 5' - CCA <u>ACT CGA</u> GTT AAA TAG GAA ACG                     | 29               |
| CH3378            | tIi(KO)-Kpn           | 5' - CCA <u>GGT ACC</u> AAA GTG CTG TGT GC                      | 29               |
| CH3418            | tIi-Kpn-for           | 5' - GAG <u>GGT ACC</u> ATG AAA TCG TTC TTA TCA GGC             | 29               |
| CH3419            | tIi-Xho-rev           | 5' - ATA <u>CTC GAG</u> CTA TTT AAC CGG AGT TGG TG              | 29               |
| CH3719            | tIi(M24)-Kpn-for      | 5' - AAA <u>GGT ACC</u> ATG GAT TTA AAA CCA G                   | This study       |
| CH4154            | tIi-Xho(H6)-rev       | 5' - CGT <u>CTC GAG</u> TTT AAC CGG AGT TGG TG                  | This study       |
| CH4452            | vgrG-Eco-for          | 5' - ATA <u>GAA TTC</u> ATG CTC AAC CGA ATT ACC                 | This study       |
| CH4762            | tIe-S341A-for         | 5' - CGA TAT TGC AGG CCA CGC TCT GGG TGG TGG G                  | This study       |
| CH4763            | tIe-S341A-rev         | 5' - CCC ACC ACC CAG AGC GTG GCC TGC AAT ATC G                  | This study       |
| CH4469            | tIe-Eco-for           | 5' - AGG GAA TTC CGA ATG TAC AAC ATA AAA TTT GTC                | This study       |
| CH5087            | tIe-T172-Spe-for      | 5' - TTT <u>ACT AGT</u> ACC AAA GCT GAA CGC TGG C               | This study       |
| CH5137            | tIi-I52-Kpn-for       | 5' - TTT <u>GGT ACC</u> ATG ATT AAA TTA GCG TCA GGG AC          | This study       |
| CH5138            | tIi-M76-Kpn-for       | 5' - TTT <u>GGT ACC</u> ATG AAT TCG ATC AAT AAT CAG AA          | This study       |
| CH5203            | Eh-vgrG(G615)-Kpn-for | 5' - CCG <u>GGT ACC</u> ACA GCA CCG GGA TC                      | This study       |
| CH5204            | Eh-vgrI-Pst-rev       | 5' - TTT <u>CTG CAG</u> CTC GAG CCC GTA AAG TTG CCT CGC         | This study       |
| CH5205            | vgrG2(G615)-Kpn-rev   | 5' - CGT <u>GGT ACC</u> TGG CTT AGC G                           | This study       |
| CH5269            | cat-Xba-for           | 5' - TTT <u>TCT AGA</u> TGT TGA TAC CGG GAA GCC                 | This study       |
| CH5270            | cat-Nsi-rev           | 5' - TTT <u>ATG CAT</u> TTA CGC CCC GCC CT                      | This study       |
| CH5770            | Eh-vgrG-K639-Sac-rev  | 5' - TTA CTC GAG <u>GAG CTC</u> TTA TTC GGC GAA AAC TTC TCC TGC | This study       |
| CH5772            | tIe-P134-Sac-for      | 5' - TTT <u>GAG CTC</u> TCC TGC GCC AAC GGT GCT G               | This study       |
| DL1667            | RE118-down-rev        | 5' - GAG ATT TTG AGA CAC AAC GTG                                | This study       |
| DL2194            | pheS*-Sph-rev         | 5' - CAA CAA <u>GCA TGC</u> CCA TAG TGA TTT GAT TTG CCA GC      | This study       |
| DL2195            | Ptet-for              | 5' - CTC ATG TTT GAC AGC TTA TCA TCG                            | This study       |
| DL2196            | pheS*-rev             | 5' - CCA TAG TGA TTT GAT TTG CCA GC                             | This study       |
| DL2197            | RE118-up-for          | 5' - GAA GAT CAG CAG TTC AAC CTG TTG                            | This study       |
| DL2198            | RE118-up-rev          | 5' - GCA TGA TAA GCT GTC AAA CAT GAG GGA TTT GCA GAC TAC GGG    | This study       |
| DL2199            | RE118-down-for        | 5' - GCT GGC AAA TCA AAT CAC TAT GGG TCA AAG GGT GAC AGC AG     | This study       |
| DL2217            | pheS*-EcoRV-for       | 5' - TTT <u>GAT ATC</u> TGA GAG GAA AAC CAT GTC                 | This study       |
|                   | Tn5-right1            | 5' - GTG AGC ATC ACA TCA CCA CA                                 | This study       |
|                   | Tn5-right2            | 5' - TCA CGT TCA TCT TTC CCT GG                                 | This study       |
|                   | Tn5-right2            | 5' - CTG TAC AAG TAA GGC CTA GC                                 | This study       |
|                   | Tn5-left1             | 5' - ATG TTT GAA TCG CTT GAT TTG G                              | This study       |
|                   | Tn5-left2             | 5' - ATT GCT CAT GAT TTC ACC TCG                                | This study       |
|                   | Tn5-left3             | 5' - CAA TAA AGC TGA CCG TTA GCG                                | This study       |
| ZR39              | tIi-KO-Sac            | 5' - TTT <u>GAG CTC</u> AAG GCA ACC TGA GTT TTT TCC             | This study       |
| ZR40              | tIi-KO-Bam            | 5' - TTT <u>GGA TCC</u> AAC GAT TTC ATG CAC GAC TCC             | This study       |
| ZR248             | tIe-Xho-rev           | 5' - TTT <u>CTC GAG</u> CTG ATA AGA ACG ATT TCA TGC ACG         | This study       |
| ZR443             | cdiB-Eco-for          | 5' - TTT <u>GAA TTC</u> GAC ATT ACA CAG GCC AGA ATA CG          | This study       |
| ZR444             | cdiB-Xho-rev          | 5' - TTT <u>CTC GAG</u> GAT CCG TAA TAA TCC CTT AAA ACG CGA CG  | This study       |
