# Supplementary material
Source: PubMed Central journal article supplement (PMC10294671)
Supplement: jb.00113-23-s0004.pdf [file jb.00113-23-s0004.pdf]

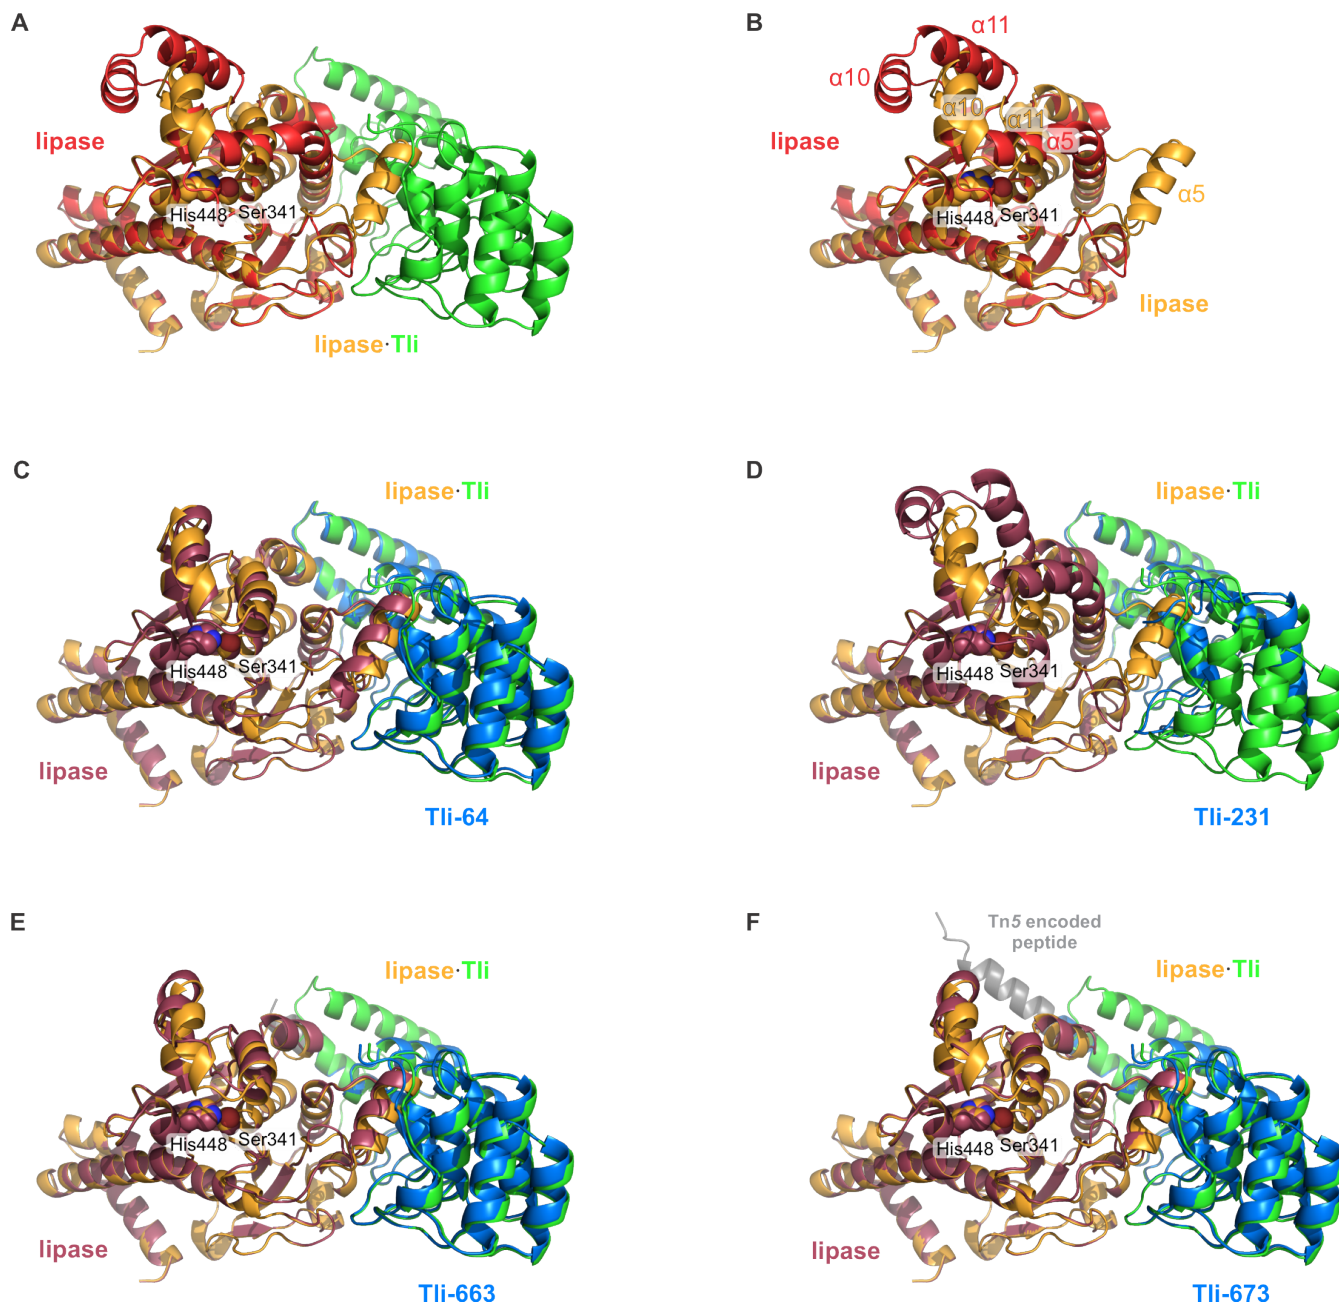

**Figure S2. AlphaFold2 modeling of lipase-immunity protein complexes.** **A)** Superimposition of structural models for the isolated lipase domain (red) and the lipase (orange) • Tli (green) complex. **B)** Predicted conformational changes in the lipase domains from panel A. The positions of helices  $\alpha 5$ ,  $\alpha 10$  and  $\alpha 11$  are indicated for the isolated lipase (red) and Tli-bound domain (orange). Models of the lipase domain (raspberry) bound to Tli-64 (**C**), Tli-231 (**D**), Tli-663 (**E**) and Tli-673 (**F**) immunity proteins colored in marine. The latter complexes are superimposed onto the wild-type lipase•Tli complex from panel A for comparison. The Tn5 encoded extension at the C-terminus of Tli-673 is colored gray (**F**). Catalytic Ser341 and His448 residues are rendered as spheres and indicated in each panel.
